# Supplementary material
Source: ML conference proceedings conference paper supplement (https://openreview.net/forum?id=Qb4PCwG9OR)
Supplement: supplementary_material [file appendix.pdf › ICCVW_supp/appendix.pdf]

# UNICST: Next-scale Latent Prediction for Continuous Spatio-Temporal World Modeling

## Supplementary Material

865 This appendix is organized as follows. In Sec. 6, we provide  
866 results of some additional tasks including novel view  
867 synthesis (Sec. 6.1) and motion planning (Sec. 6.2). In  
868 Sec. 7, extra ablation studies further show the explain the  
869 roles of each module in our method. Sec. 8 gives more  
870 qualitative results of synthetic driving scenarios. Finally,  
871 we discuss the limitations of our work in Sec. 9.

## 872 6. Additional Tasks

### 873 6.1. Novel View Synthesis

874 We follow [68] to evaluate the performance of UNICST in  
875 novel view synthesis task on nuScenes validation set. Different  
876 shifts  $\{1m, 2m, 4m\}$  along the  $x$ -axis and  $y$ -axis of  
877 ego-vehicle are applied to the camera viewpoints. We measure  
878 the FID and FVD metrics between the synthetic shifted  
879 multiview videos and the original real videos. In Tab. 6,  
880 our FID and FVD metrics only drop slightly after view-  
881 point shifting. Compared to baselines, UNICST exhibits  
882 a significant performance gain even if it does not include  
883 any 3D inductive bias such as radiance field. These results  
884 demonstrate the great capability of UNICST in novel view  
885 synthesis in a data-driven manner.

### 886 6.2. Motion Planning

887 UNICST can also output future trajectories of ego-vehicle  
888 in addition to multiview video generation. In Fig. 5,  
889 we visualize some qualitative motion planning results on  
890 nuScenes validation set, where the model takes ground-  
891 truth multiview images as inputs. As a motion planning  
892 model, UNICST can handle various scenarios including  
893 turning and circumventing a stationary vehicle.

## 894 7. Additional Ablation Studies

895 In this part, we provide additional ablation studies to further  
896 analyze the role of each module in UNICST. In Sec. 7.1, the  
897 effect of classifier-free guidance is discussed. In Sec. 7.2,  
898 we compare the image quality for single-frame or multi-  
899 frame generation. In Sec. 7.3, we compare our proposed de-  
900 coupled spatio-temporal condition module with vanilla full  
901 attention design. In Sec. 7.2 and 7.1, we directly conduct  
902 experiments on our base model (as in Tab. 2 in the main  
903 paper) to explicitly reflect the influence on our final perfor-  
904 mance. In Sec. 7.3, we follow the setting in Sec. 4.4 of our  
905 main paper to apply a smaller model and less training data  
906 to speed up the training process.

### 7.1. Classifier-Free Guidance 907

908 Similar with diffusion models [29], UNICST can also be  
909 enhanced through classifier-free guidance (CFG) for the  
910 output logits. In Tab. 2 of our main paper, we adopt CFG  
911 weight 3 as the default setting. However, in Tab. 7, im-  
912 proved performance is witnessed with higher CFG weights,  
913 which can reflect the input conditions more significantly. In  
914 the same time, we also notice that the CFG weight can get  
915 saturated when the weight is high like (*e.g.* 7).

### 7.2. Single-Frame Generation 916

917 UNICST can also handle independent single-frame gener-  
918 ation task, where the model only generates the first frame  
919 without any actual cross-frame temporal reliance. In Tab. 8,  
920 we report the metrics for both single-frame and multi-frame  
921 generation pipelines with our base model. Single-frame  
922 generation can achieve comparable FID with multi-frame  
923 generation which reflects similar image quality. However,  
924 this strategy sacrifices the coherence across frames, so it  
925 cannot generate smooth videos.

### 7.3. Decoupled Spatio-Temporal Modules 926

927 In Sec. 3.4 of the main paper, we elaborate the decoupled  
928 modules scale, spatial, and temporal conditions. Another  
929 intuitive strategy is to apply full attention in a single self-  
930 attention module over all camera views and all historical  
931 frames. In this case, for each frame, the per-scale multi-  
932 view features attend to all the all scale-wise features in past  
933 frames from all camera views. In Tab. 9, we find the vanilla  
934 full attention brings significantly worse performance, and  
935 intuitively has higher time and memory costs. It cannot  
936 effectively benefit from the pretraining since the scale-  
937 wise causality no longer exists. The self-attention module  
938 should learn more spatio-temporal correlation rather than  
939 pure next-scale prediction.

## 8. Additional Qualitative Results 940

941 In attached three mp4 files, we provide synthetic 10Hz  
942 videos with eight camera views with resolution  $384 \times$   
943  $672$ . Ideally, UNICST can generate infinite length videos  
944 through sliding window in an autoregressive manner. Given  
945 the 100MB limitation of supplementary materials, we pro-  
946 vide 3 videos with 10s length of each. The synthetic high-  
947 resolution videos show high visual quality and fidelity to  
948 object conditions. They demonstrate realistic street views  
949 and can also simulate the motion of ego vehicle and other

Table 6. Novel view synthesis performance with camera view shifts

| Method                    | Shift 1m |        | Shift 2m |        | Shift 4m |        |
|---------------------------|----------|--------|----------|--------|----------|--------|
|                           | FID      | FVD    | FID      | FVD    | FID      | FVD    |
| PVG [14]                  | 48.15    | 246.74 | 60.44    | 356.23 | 84.50    | 501.16 |
| EmerNeRF [82]             | 37.57    | 171.47 | 52.03    | 294.55 | 76.11    | 497.85 |
| StreetGaussian [80]       | 32.12    | 153.45 | 43.24    | 256.91 | 67.44    | 429.98 |
| OmniRe [16]               | 31.48    | 152.01 | 43.31    | 254.52 | 67.36    | 428.20 |
| FreeVS [68]               | 51.26    | 431.99 | 62.04    | 497.37 | 77.14    | 556.14 |
| UNICST <sub>x-shift</sub> | 14.75    | 139.60 | 15.04    | 139.94 | 15.34    | 147.36 |
| UNICST <sub>y-shift</sub> | 14.54    | 138.47 | 14.63    | 140.83 | 15.90    | 151.60 |

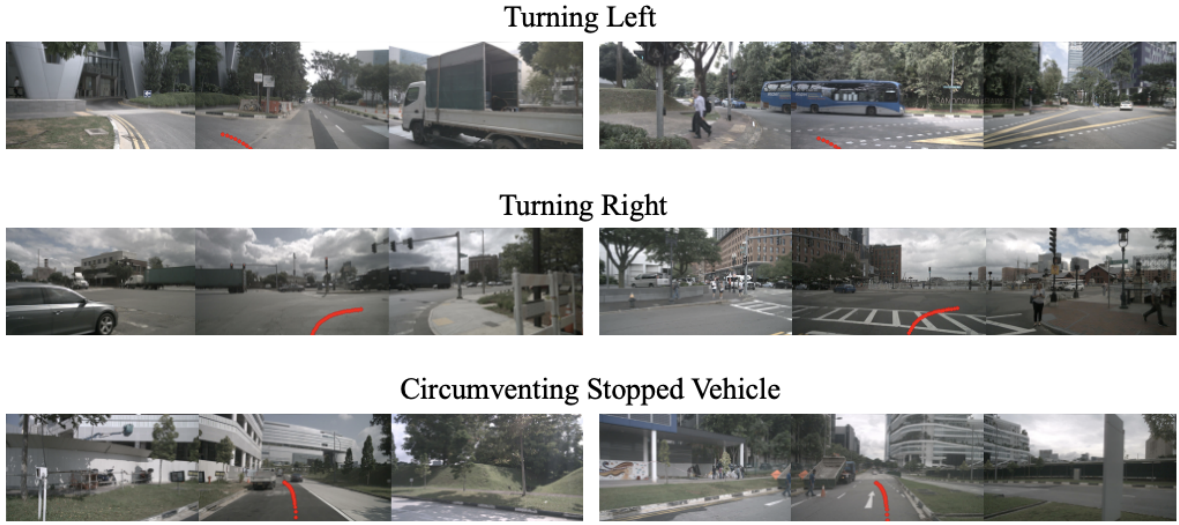

Figure 5. Motion planning qualitative results on nuScenes validation set. All the images are ground-truths from the front three camera views.

Table 7. Ablation on classifier-free guidance

| CFG   | FID         | FVD        |
|-------|-------------|------------|
| CFG=1 | 20.6        | 165        |
| CFG=3 | 14.5        | 134        |
| CFG=5 | 13.0        | 114        |
| CFG=7 | <b>12.8</b> | 102        |
| CFG=9 | 13.2        | <b>101</b> |

Table 8. Ablation on single-frame generation

| Methods      | FID         | FVD |
|--------------|-------------|-----|
| Multi-frame  | 14.5        | 134 |
| Single-frame | <b>14.3</b> | -   |

Table 9. Ablation on decoupled spatio-temporal modules

| Attention | FID         | FVD        |
|-----------|-------------|------------|
| Full      | 70.2        | 618        |
| Decouple  | <b>21.7</b> | <b>241</b> |

larger scale of training data.

## 9. Limitations

Currently, UNICST is mainly limited by the amount and diversity of training data. In this paper, the model is only trained with the combination of two open datasets: nuScenes [10] and nuPlan [12]. The total length is only about 60 hours, which is significantly less than thousands of hours in many previous works [20, 32, 83]. Besides, our training data are limited to driving scenarios captured from the ego-vehicle. Since UNICST can take heteroge-

agents. However, we also notice some slight shakes and object-wise inconsistency, which may be solved with a

962 neous training data with various sensor setups, we can po-  
963 tentially include indoor scenes from navigation robots and  
964 outdoor off-road scenarios from delivery robots to further  
965 improve the generalization ability of UNICST.
